# Supplementary material
Source: PubMed Central journal article supplement (PMC152251)

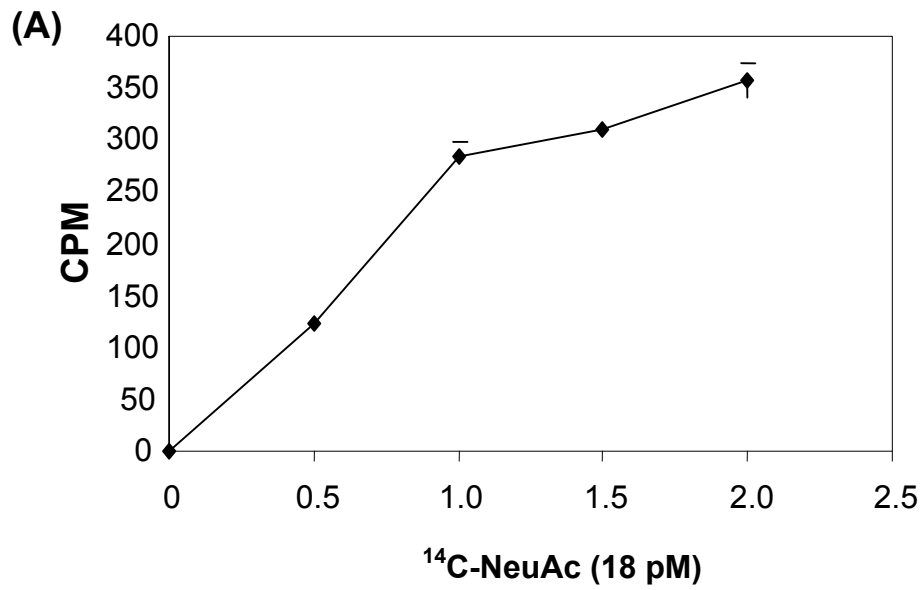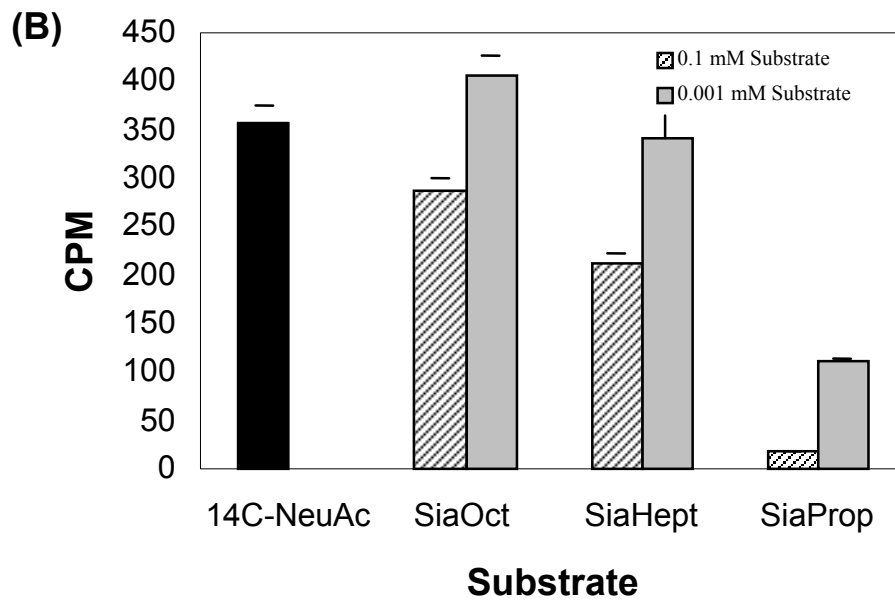

Supplement: pnas_0437851100_6.pdf [file pnas_0437851100_6.pdf]
